# Supplementary material for: Tenofovir alafenamide treatment may not worsen the lipid profile of chronic hepatitis B patients: A propensity score-matched analysis
Source: PubMed Central journal article supplement — Clin Mol Hepatol. 2021 Dec 28;28(2):254–64. doi: 10.3350/cmh.2021.0314 (PMC9013607; doi:10.3350/cmh.2021.0314), 2021-12-28
Supplement: cmh-2021-0314-suppl1.pdf [file cmh-2021-0314-suppl1.pdf]

**Supplementary Table 1.** Baseline characteristics of the TDF groups compared to the non-HBV infected control group and the propensity score-matched cohort

| Characteristic         | TDF<br>(n=898) | Non-HBV-<br>infected control<br>(n=3,698) | P-value | TDF<br>(n=368) | Non-HBV-<br>infected control<br>(n=1,472) | P-value |
|------------------------|----------------|-------------------------------------------|---------|----------------|-------------------------------------------|---------|
| Age (years)            | 51.1±10.9      | 51.1±7.5                                  | 0.942   | 50.0±10.8      | 50.0±7.7                                  | 0.961   |
| BMI                    | 23.6±3.0       | 24.3±2.9                                  | <0.001  | 23.8±2.9       | 23.9±2.8                                  | 0.559   |
| Male sex (%)           | 587 (65.4)     | 2,818 (73.2)                              | 0.001   | 264 (71.7)     | 1,081 (73.4)                              | 0.460   |
| Hypertension (%)       | 39 (4.4)       | 831 (21.6)                                | <0.001  | 19 (5.2)       | 81 (5.5)                                  | 0.611   |
| DM (%)                 | 79 (8.8)       | 252 (6.5)                                 | 0.083   | 20 (5.4)       | 78 (5.3)                                  | 0.906   |
| Dyslipidemia (%)       | 29 (3.2)       | 1431 (37.2)                               | <0.001  | 14 (3.8)       | 60 (4.1)                                  | 0.486   |
| TC at baseline (mg/dL) | 173.8±35.1     | 184.2±34.4                                | <0.001  | 167.5±24.6     | 169.1±24.6                                | 0.292   |

Values are presented as mean±standard deviation or number (%).

TDF, tenofovir disoproxil fumarate; HBV, hepatitis B virus; BMI, body mass index; DM, diabetes mellitus; TC, total cholesterol.
