# Supplementary material for: Tenofovir alafenamide treatment may not worsen the lipid profile of chronic hepatitis B patients: A propensity score-matched analysis
Source: PubMed Central journal article supplement — Clin Mol Hepatol. 2021 Dec 28;28(2):254–64. doi: 10.3350/cmh.2021.0314 (PMC9013607; doi:10.3350/cmh.2021.0314), 2021-12-28
Supplement: cmh-2021-0314-suppl2.pdf [file cmh-2021-0314-suppl2.pdf]

**Supplementary Table 2.** Clinical characteristics at baseline and 48-week clinical outcomes of TAF compared to TDF in the propensity score-matched cohort

| Characteristic                    | TAF (n=70)  | TDF (n=140) | P-value |
|-----------------------------------|-------------|-------------|---------|
| SBP (mmHg)                        | 121.8±10.8  | 122.8±12.5  | 0.711   |
| Fatty liver disease (%)           | 12 (17.1)   | 37 (26.4)   | 0.867   |
| Platelet (1,000/mm <sup>3</sup> ) | 179.0±64.2  | 188.4±58.9  | 0.213   |
| Albumin (g/dL)                    | 4.3±0.4     | 4.4±0.4     | 0.082   |
| Bilirubin (mg/dL)                 | 0.9±0.6     | 1.0±1.0     | 0.616   |
| PT (INR)                          | 1.0±0.1     | 1.2±0.4     | 0.168   |
| AST (U/mL)                        | 84.5±124.2  | 95.6±211.6  | 0.636   |
| ALT (U/mL)                        | 128.9±212.4 | 146.8±381.2 | 0.669   |
| AFP (ng/dL)                       | 9.2±28.1    | 9.7±30.2    | 0.887   |
| HBeAg positivity (%)              | 46 (65.7)   | 88 (62.9)   | 0.617   |
| Clinical outcome                  |             |             |         |
| Serum Cr. at 48 weeks (mg/dL)     | 0.9±0.2     | 0.9±0.2     | 0.284   |
| ALT normalization (%)             | 57 (81.4)   | 101 (72.1)  | 0.194   |
| VR 12 (%)                         | 66 (94.3)   | 123 (87.9)  | 0.223   |

Values are presented as mean±standard deviation or number (%).

TAF, tenofovir alafenamide; TDF, tenofovir disoproxil fumarate; SBP, systolic blood pressure; PT, prothrombin time; INR, international normalized ratio; AST, aspartate aminotransferase; ALT, alanine aminotransferase; AFP, alpha-fetoprotein; HBeAg, hepatitis B e antigen; Cr., creatinine; VR12, virologic response at 12 months.
