# Supplementary material for: Tenofovir alafenamide treatment may not worsen the lipid profile of chronic hepatitis B patients: A propensity score-matched analysis
Source: PubMed Central journal article supplement — Clin Mol Hepatol. 2021 Dec 28;28(2):254–64. doi: 10.3350/cmh.2021.0314 (PMC9013607; doi:10.3350/cmh.2021.0314), 2021-12-28
Supplement: cmh-2021-0314-suppl3.pdf [file cmh-2021-0314-suppl3.pdf]

**Supplementary Table 3.** Changes in all lipid profiles at baseline and 48 weeks in the TAF group compared to the non-HBV infected control subjects after propensity score matching

| Lipid level   | TAF (n=45)  |             |         | Non-HBV-infected control (n=180) |            |         |
|---------------|-------------|-------------|---------|----------------------------------|------------|---------|
|               | Baseline    | 48 weeks    | P-value | Baseline                         | 48 weeks   | P-value |
| TC (mg/dL)    | 167.8±35.0  | 178.5±36.0  | 0.001   | 169.8±28.5                       | 176.6±31.3 | 0.002   |
| LDL-C (mg/dL) | 107.6±27.7  | 116.8±32.4  | 0.006   | 111.1±28.4                       | 117.4±30.3 | 0.004   |
| HDL-C (mg/dL) | 50.9±15.0   | 53.0±14.7   | 0.097   | 52.6±12.3                        | 54.4±13.8  | 0.007   |
| TG (mg/dL)    | 116.9±109.7 | 126.1±104.1 | 0.201   | 121.0±71.9                       | 111.4±63.8 | 0.019   |
| TC/HDL ratio  | 3.5±1.1     | 3.5±1.0     | 0.706   | 3.4±0.9                          | 3.4±0.9    | 0.572   |
| LDL/HDL ratio | 2.3±0.8     | 2.3±0.9     | 0.337   | 2.2±0.8                          | 2.3±0.8    | 0.225   |

Values are presented as mean±standard deviation.

TAF, tenofovir alafenamide; HBV, hepatitis B virus; TC, total cholesterol; LDL-C, low density lipoprotein cholesterol; HDL-C, high density lipoprotein cholesterol; TG, triglyceride.
