# Supplementary material for: Tenofovir alafenamide treatment may not worsen the lipid profile of chronic hepatitis B patients: A propensity score-matched analysis
Source: PubMed Central journal article supplement — Clin Mol Hepatol. 2021 Dec 28;28(2):254–64. doi: 10.3350/cmh.2021.0314 (PMC9013607; doi:10.3350/cmh.2021.0314), 2021-12-28
Supplement: cmh-2021-0314-suppl4.pdf [file cmh-2021-0314-suppl4.pdf]

**Supplementary Table 4.** Comparison of TC changes in the TDF group compared to the non-HBV infected control group after propensity score matching

| Total cholesterol level | TDF<br>(n=368) | Non-HBV-infected control<br>(n=1,472) | P-value |
|-------------------------|----------------|---------------------------------------|---------|
| TC at baseline (mg/dL)  | 167.5±24.6     | 169.1±24.6                            | 0.292   |
| TC at 48 weeks (mg/dL)  | 156.2±28.3     | 175.0±29.5                            | <0.001  |
| Delta-TC during 1 year  | -11.3±27.3     | 5.8±23.4                              | <0.001  |
| TC at baseline (mg/dL)  |                |                                       |         |
| 240 ≤ TC < 300          | 3 (0.82)       | 9 (0.61)                              | 0.716   |
| ≥ 300                   | 0 (0.00)       | 0 (0.00)                              |         |
| TC at 48 weeks (mg/dL)  |                |                                       |         |
| 240 ≤ TC < 300          | 1 (0.27)       | 24 (1.63)                             | 0.043   |
| ≥ 300                   | 0 (0.00)       | 0 (0.00)                              |         |

Values are presented as mean±standard deviation or number (%).

TDF, tenofovir disoproxil fumarate; HBV, hepatitis B virus; TC, total cholesterol; delta-TC, total cholesterol changes during the observation period.
