# Supplementary material for: Tenofovir alafenamide treatment may not worsen the lipid profile of chronic hepatitis B patients: A propensity score-matched analysis
Source: PubMed Central journal article supplement — Clin Mol Hepatol. 2021 Dec 28;28(2):254–64. doi: 10.3350/cmh.2021.0314 (PMC9013607; doi:10.3350/cmh.2021.0314), 2021-12-28
Supplement: cmh-2021-0314-suppl5.pdf [file cmh-2021-0314-suppl5.pdf]

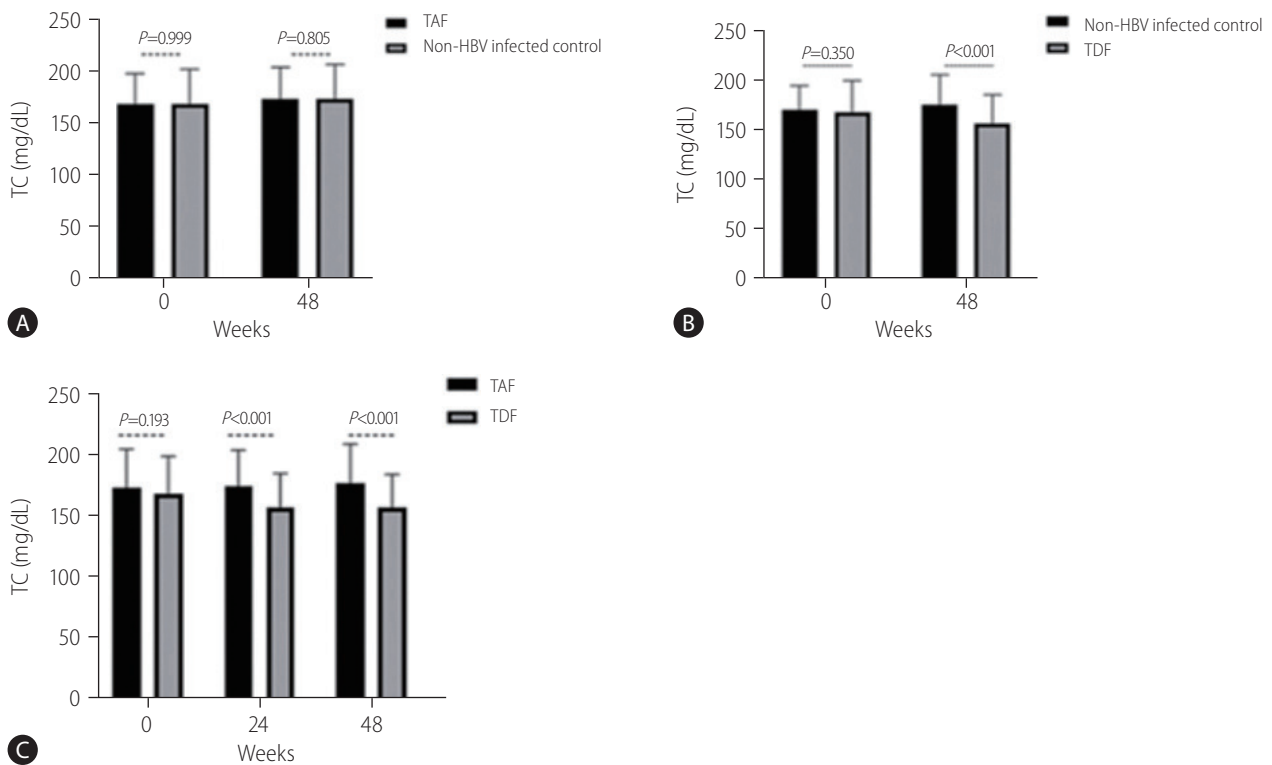

**Supplementary Figure 1.** (A) Comparison of TC level at baseline to that at 48 weeks in the TAF (n=140) and non-HBV-infected control (n=560) groups. (B) Comparison of TC levels at baseline to that at 48 weeks in the TDF (n=368) and non-HBV-infected control groups (n=1,472). (C) Comparison of TC level at baseline to that measured at 24 and 48 weeks in the TAF (n=92) and TDF groups (n=276). TC, total cholesterol; TAF, tenofovir alafenamide; TDF, tenofovir disoproxil fumarate; HBV, hepatitis B virus.
